# Supplementary material
Source: Springer Nature journal article supplement (https://www.springermedizin.de/resource/supplementary/12936_2003_49_MOESM1_ESM.pdf/9546756)

### (A)

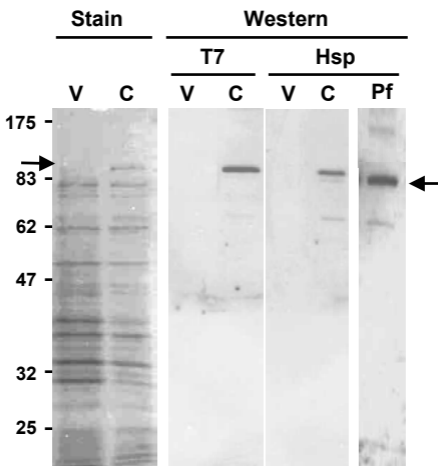

### (B)

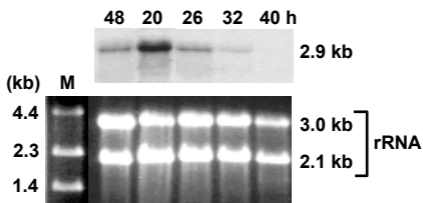

### (C)

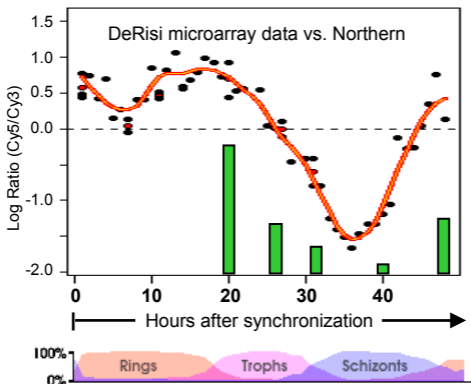

### (D)

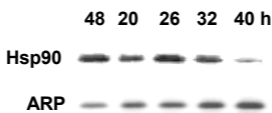

Supplement: MOESM1 [file 9546756]
